# Supplementary material for: Thermochemical synthesis of Mo nano/microspheres: growth kinetics, electrocatalytic hydrogen evolution, and DFT insights
Source: Royal Society of Chemistry journal article supplement (doi:10.1039/d4qm00814f), 2024-11-15
Supplement: d4qm00814f1.pdf [file d4qm00814f1.pdf]

## Supporting Information

### Thermochemical synthesis of Mo nano/microspheres: Growth kinetics, electrocatalytic hydrogen evolution, and DFT insights

Hayk Nersisyan<sup>a</sup>, Junmo Jeong<sup>b</sup>, Hoyoung Suh<sup>c</sup>, JongHyeon Lee<sup>a,b</sup>

<sup>a</sup>RASOM, Chungnam National University, 99 Daehak-ro, Yuseong-gu, Daejeon, 34134,  
Republic of Korea

<sup>b</sup>Graduate School of Materials Science & Engineering, Chungnam National University, 99  
Daehakro, Yuseong-gu, Daejeon, 34134, Republic of Korea

<sup>c</sup>Advanced Analysis Center, Korea Institute of Science and Technology, 5 Hwarang-ro 14-gil,  
Seonbuk-gu, Seoul 022792, Republic of Korea

Corresponding author: Jong Hyeon Lee,

E-mail: [jonglee@cnu.ac.kr](mailto:jonglee@cnu.ac.kr)

## 1. SEM microstructures

The micrographs of the reaction product obtained from the  $\text{MoO}_3+10\text{Zn}$  mixture after the temperature surge. They illustrate the morphology of the product before and after acid purification.

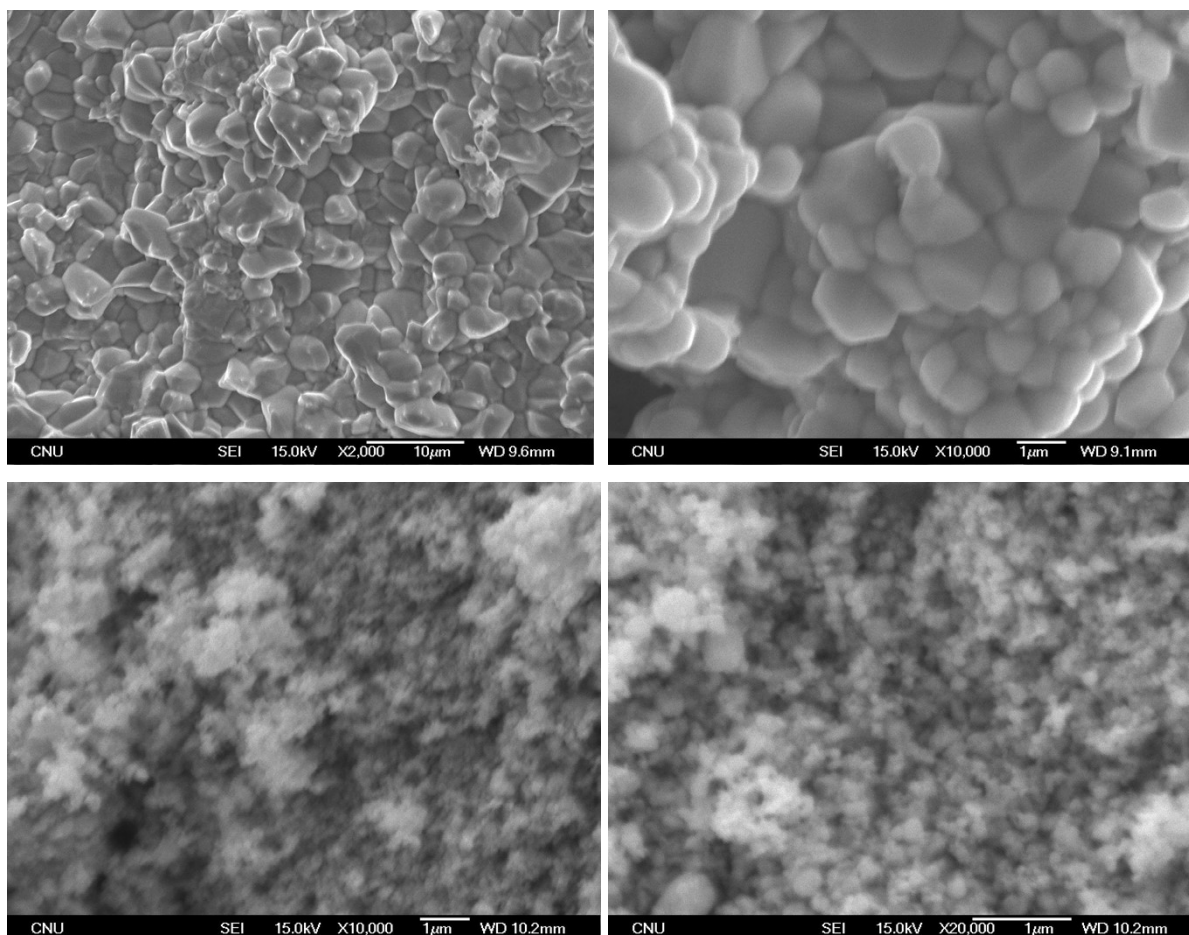

Fig. S1. SEM micrographs of various magnifications: (a, b) reaction product (c, d) purified product ( $\text{Mo}+10\text{Zn}$ ).

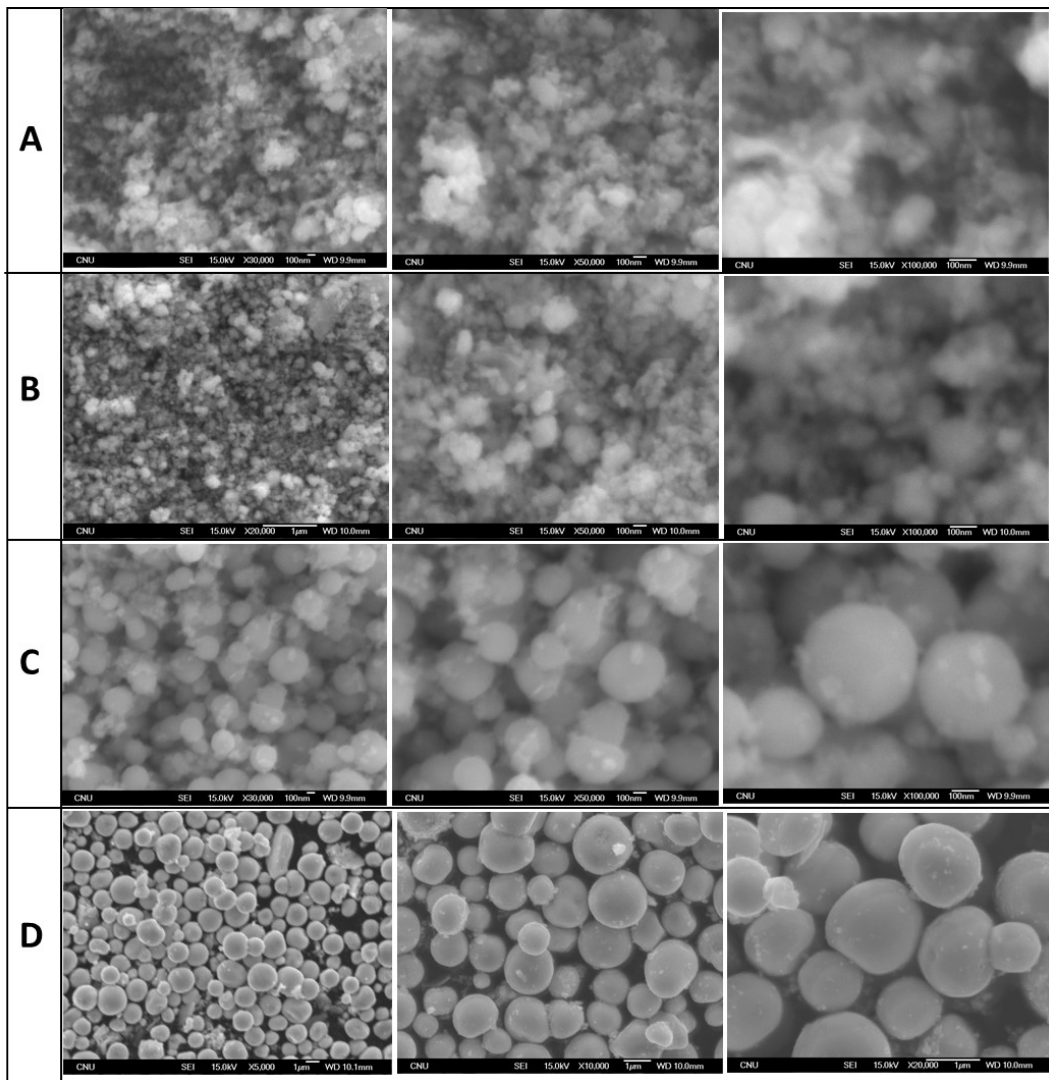

Fig. S2. SEM images of Mo samples prepared from MoO<sub>3</sub>+10Zn mixture at different processing temperatures for 2 hours: **A.** 500 °C; **B.** 600 °C; **C.** 700 °C and **D.** 800 °C.

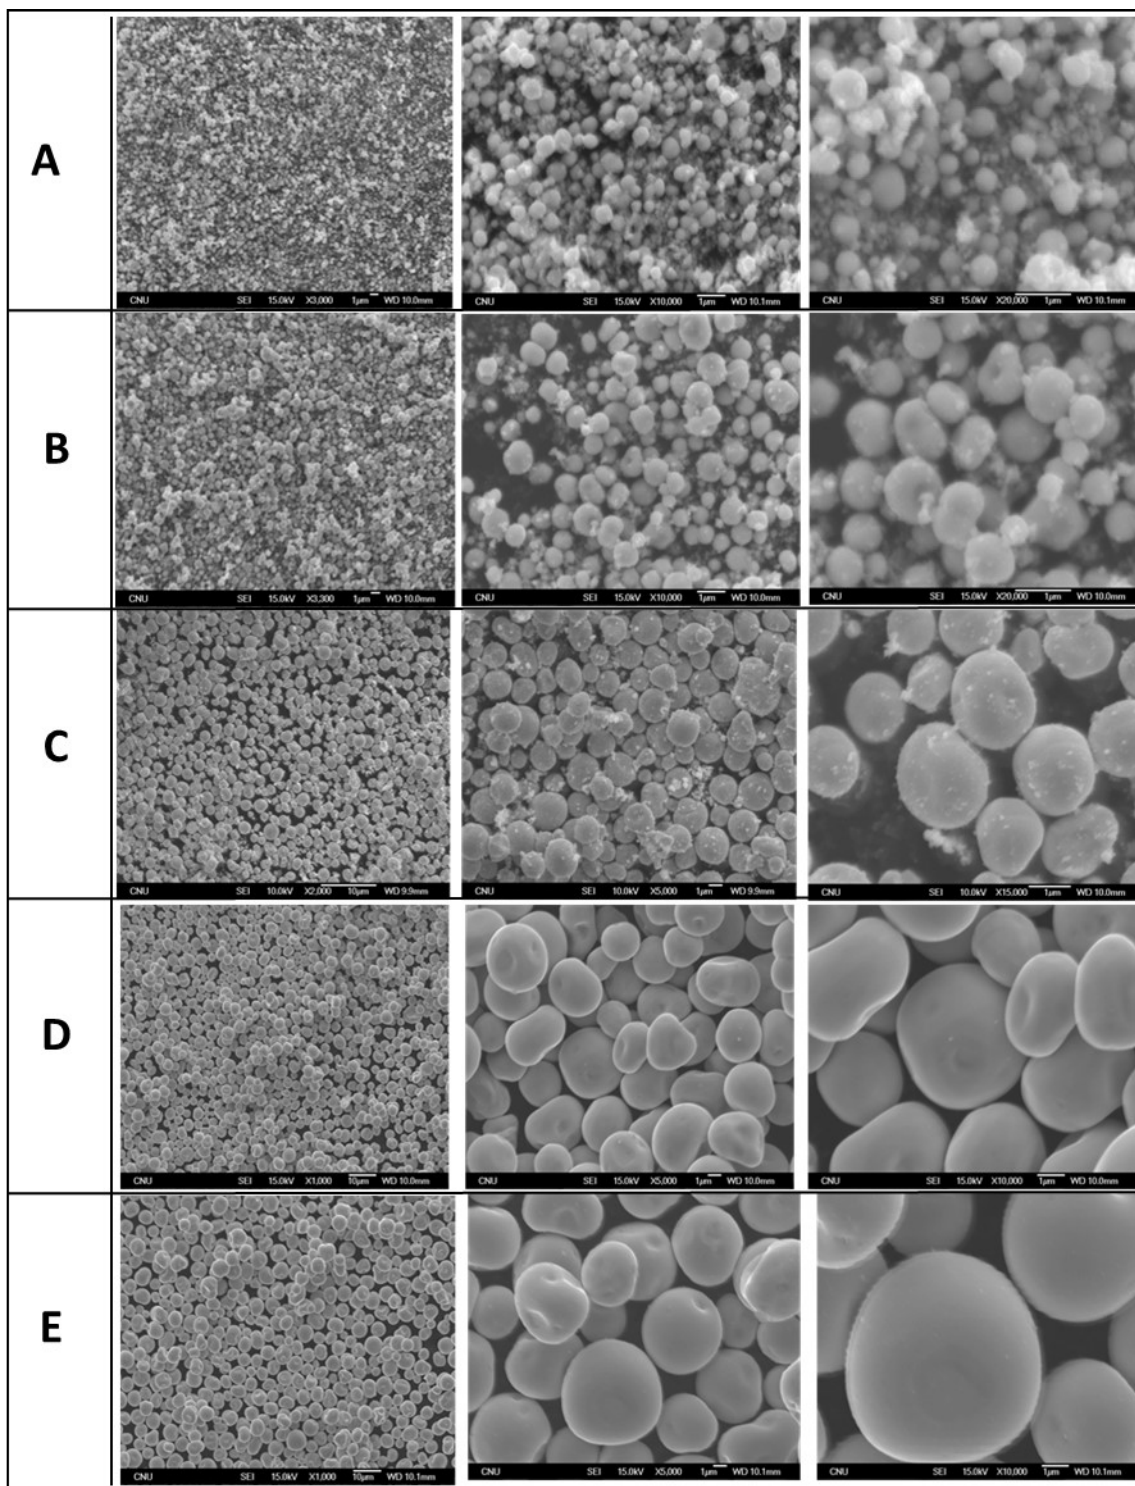

Fig. S3. SEM images of Mo samples prepared from  $\text{MoO}_3+10\text{Zn}$  mixture at  $800\text{ }^\circ\text{C}$  for different processing times (hours): **A.** 0.17; **B.** 0.5; **C.** 2; **D.** 10.0; **E.** 20.0.

## 2. SEM/EDS mapping

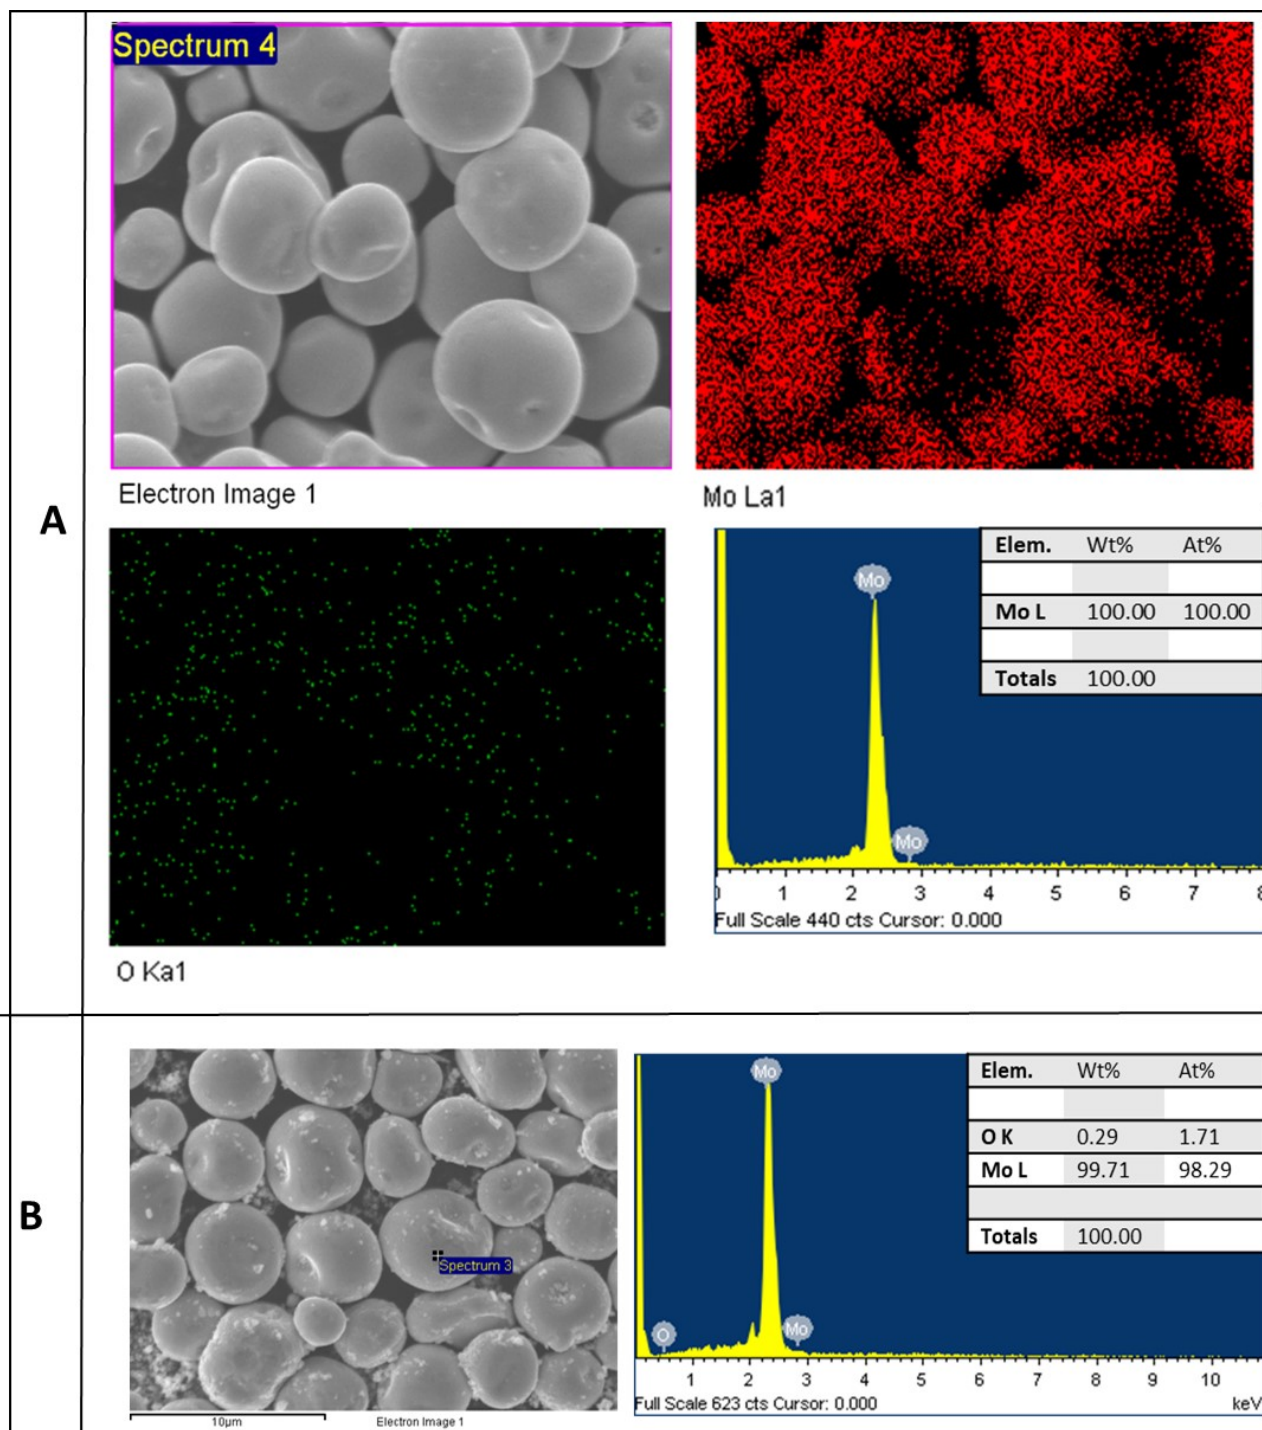

Fig. S4. **A.** SEM/EDS mapping of Mo microspheres derived at 800 °C for 20 hours; **B.** SEM/EDS spectra of Mo microsphere derived at 800 °C for 10 hours.

### 3. XPS spectras

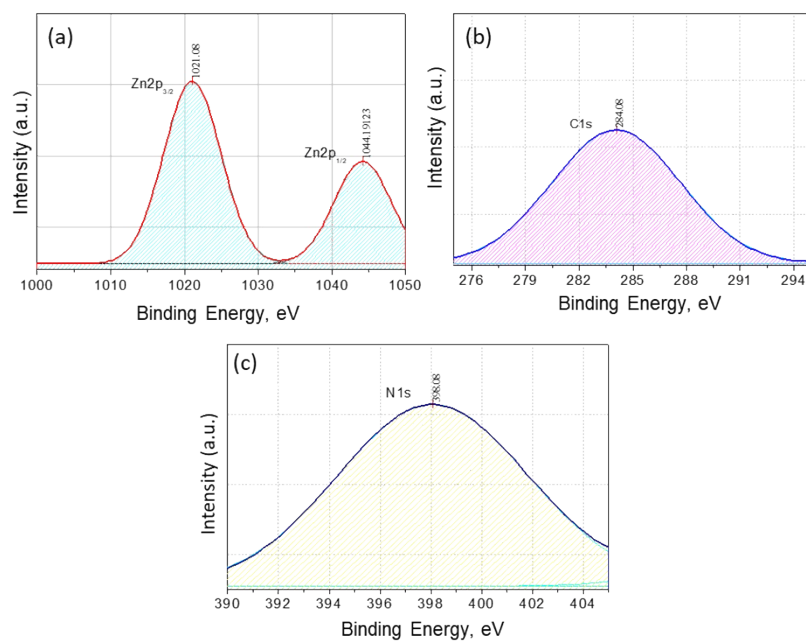

Fig. S5. Gaussian fitting of Zn2p, C1s and N1s elements in Mo powder.

#### 4. $\text{WO}_3+7\text{Zn}$ system

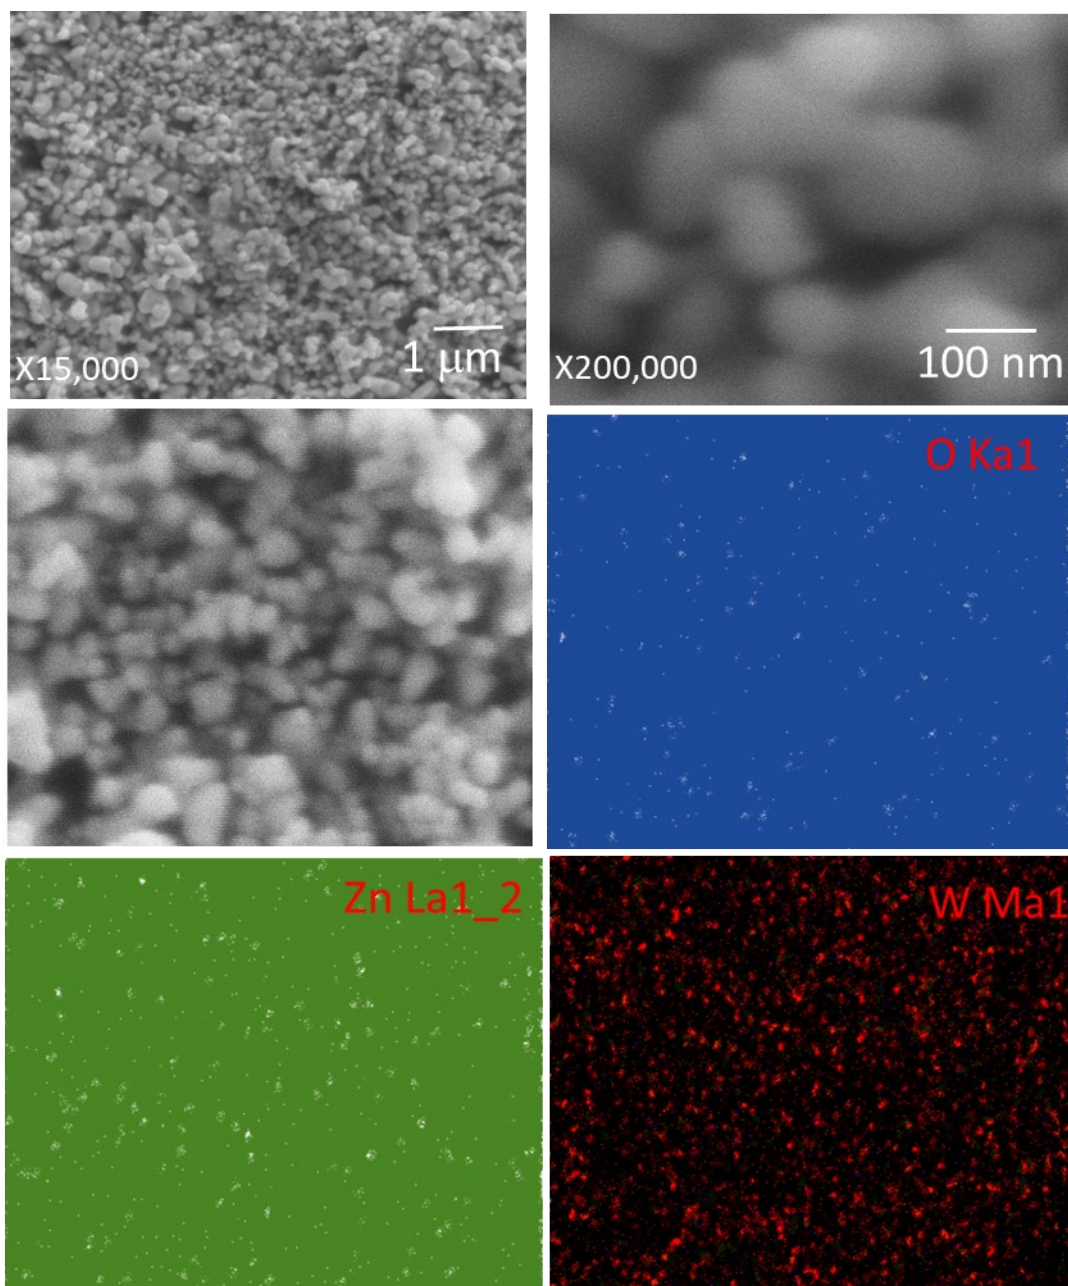

Fig. S6. Tungsten nanoparticles obtained from  $\text{WO}_3+7\text{Zn}$  mixture at 800 °C for 2 hours.

## 5. $\text{MoO}_3+30\text{Mg}$ system

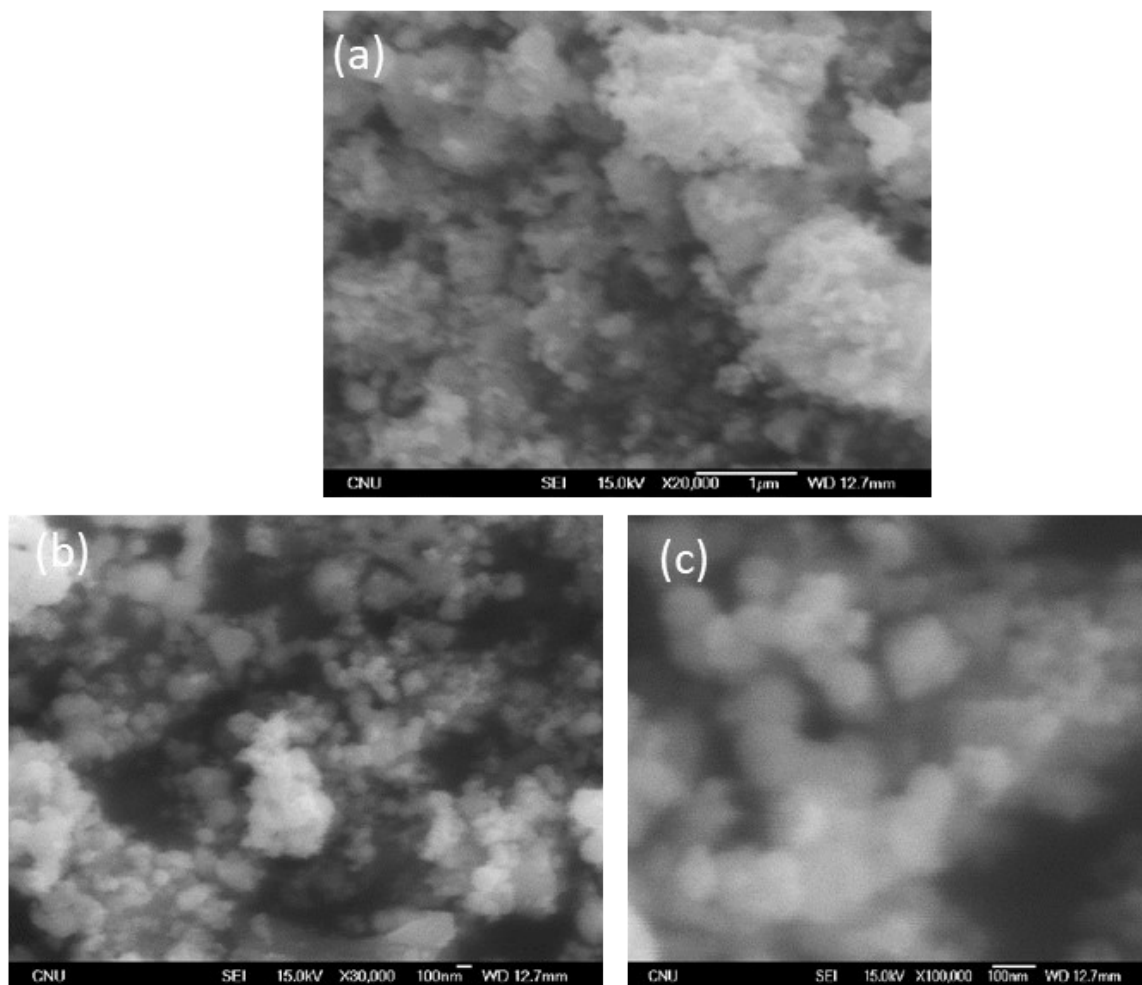

Fig. S7. SEM micrographs of Mo particles synthesized from  $\text{MoO}_3+30\text{Mg}$  mixture at  $800\text{ }^\circ\text{C}$ .



## 6. Catalytic test performance

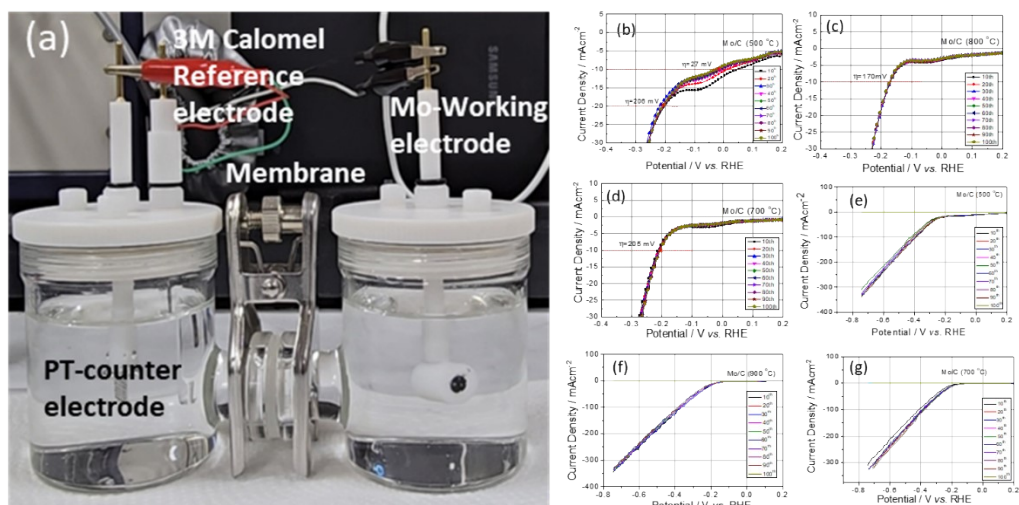

Fig. S8. (a) Three electrode systems for catalytic test performance. (b– g) Polarization curves for Mo-catalysts.

## 7. Polarization curves

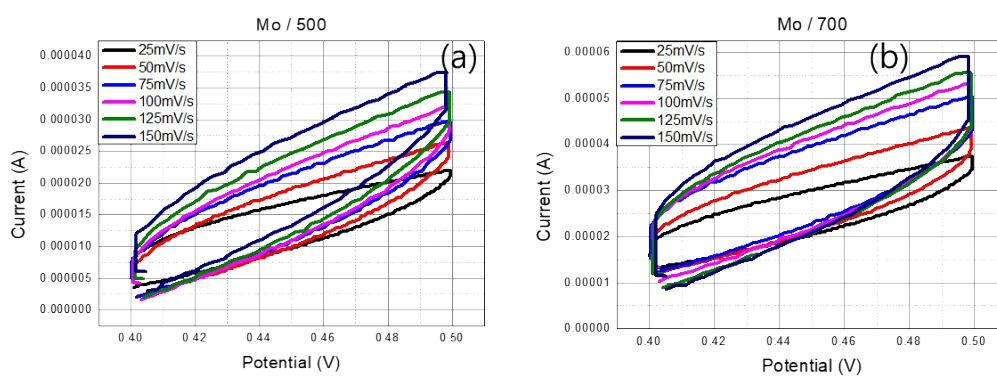

Fig. S9. Polarization curves with respect to scan rates: (a) Mo-500, (b) Mo-700.

## 8. Faradaic efficiency calculation

The following equation performed the Faradic Efficiency (FE) calculation:

$$\text{FE (\%)} = \frac{n_{\text{actual}}}{n_{\text{theoretical}}} * 100;$$

$$n_{\text{actual}} = \frac{PV}{RT}; \quad n_{\text{theoretical}} = \frac{Q}{nxF};$$

### 8.1. Total charge calculation:

- Current (I) = 100 mA = 0.1A
- Time (t) = 6 minutes 30 seconds = 390 seconds
- Volume of hydrogen gas (V) = 4 ml =  $4 \times 10^{-3}$  L
- Applied voltage: -2.77~2.82 V
- $Q = I \times t = 0.1\text{A} \times 390\text{s} = 39\text{C}$

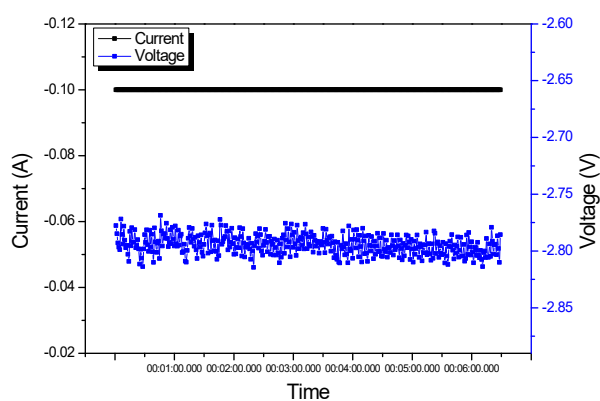

### 8.2. Hydrogen volume monitoring by experimental device;

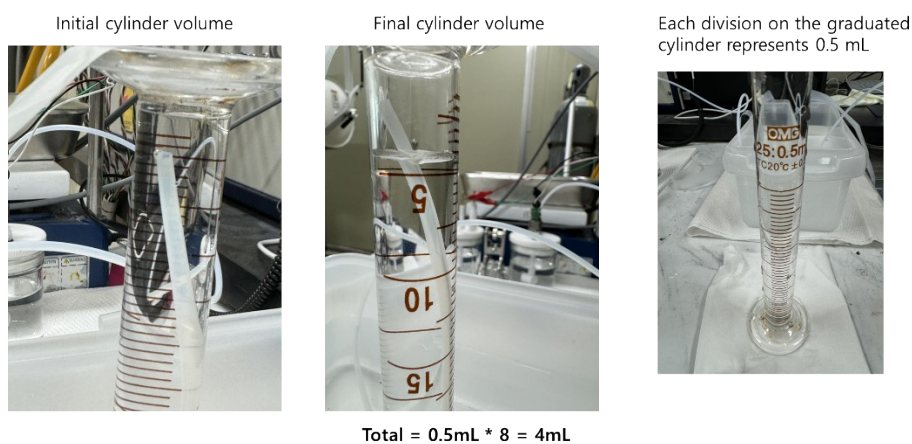

Fig. S10. Experimental set-up for hydrogen volume measurement

8.3. *Actual amount of Hydrogen ( $n_{actual}$ ):*

- $P = 101325$  Pa (standard atmospheric pressure)
- $V = 4 \times 10^{-3}$  L (volume of hydrogen)
- $R = 8.314$  J/(mol.K) (ideal gas constant)
- $T = 298$  K (room temperature)

$$n_{actual} = 101325 \times 4 \times 10^{-3} / 8.314 \times 298 = 1.69 \times 10^{-4} \text{ mol}$$

8.4. *Theoretical amount of hydrogen ( $n_{theoretical}$ )*

- $n = 2$  (number of electrons to produce 1 mole of hydrogen)
- $F = 96485$  C/mol (Faraday's constant)

$$n_{theoretical} = 39 / 2 \times 96485 = 2.02 \times 10^{-4} \text{ mol}$$

8.5. *Faradaic Efficiency =  $1.69 \times 10^{-4} \text{ mol} / 2.02 \times 10^{-4} \text{ mol} \times 100 = 83.7\%$*

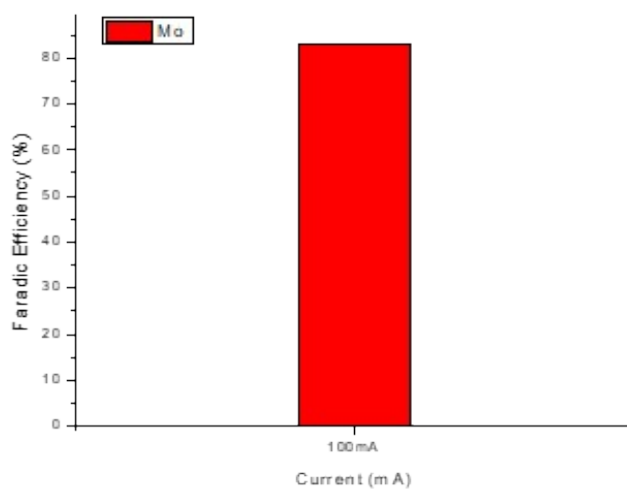

Fig. S11. Faradic efficiency
